# Supplementary material
Source: publisher site journal article supplement (https://www.spandidos-publications.com/7879/downloadSupplementary)

Figure S1. Association of STING1-related prognostic signature genes with clinical features in PAAD. Kaplan-Meier analysis of the impact of (A) DTX4 expression, (B) IFI16 expression, (C) PRKDC expression, (D) MAVS expression, and (E) IFIT2 and ZDHHC1 expression on survival, grade and stage. STING, stimulator of interferon genes; DTX4, E3 ubiquitin-protein ligase DTX4; IFI16,  $\gamma$ -interferon-inducible protein 16; PRKDC, DNA-dependent protein kinase catalytic subunit; MAVS, mitochondrial anti-viral-signaling protein; PAAD, pancreatic ductal adenocarcinoma; PAAD, pancreatic adenocarcinoma; IFIT2, interferon-induced protein with tetratricopeptide repeats 2; ZDHHC1, zinc finger DHHC-type containing 1.

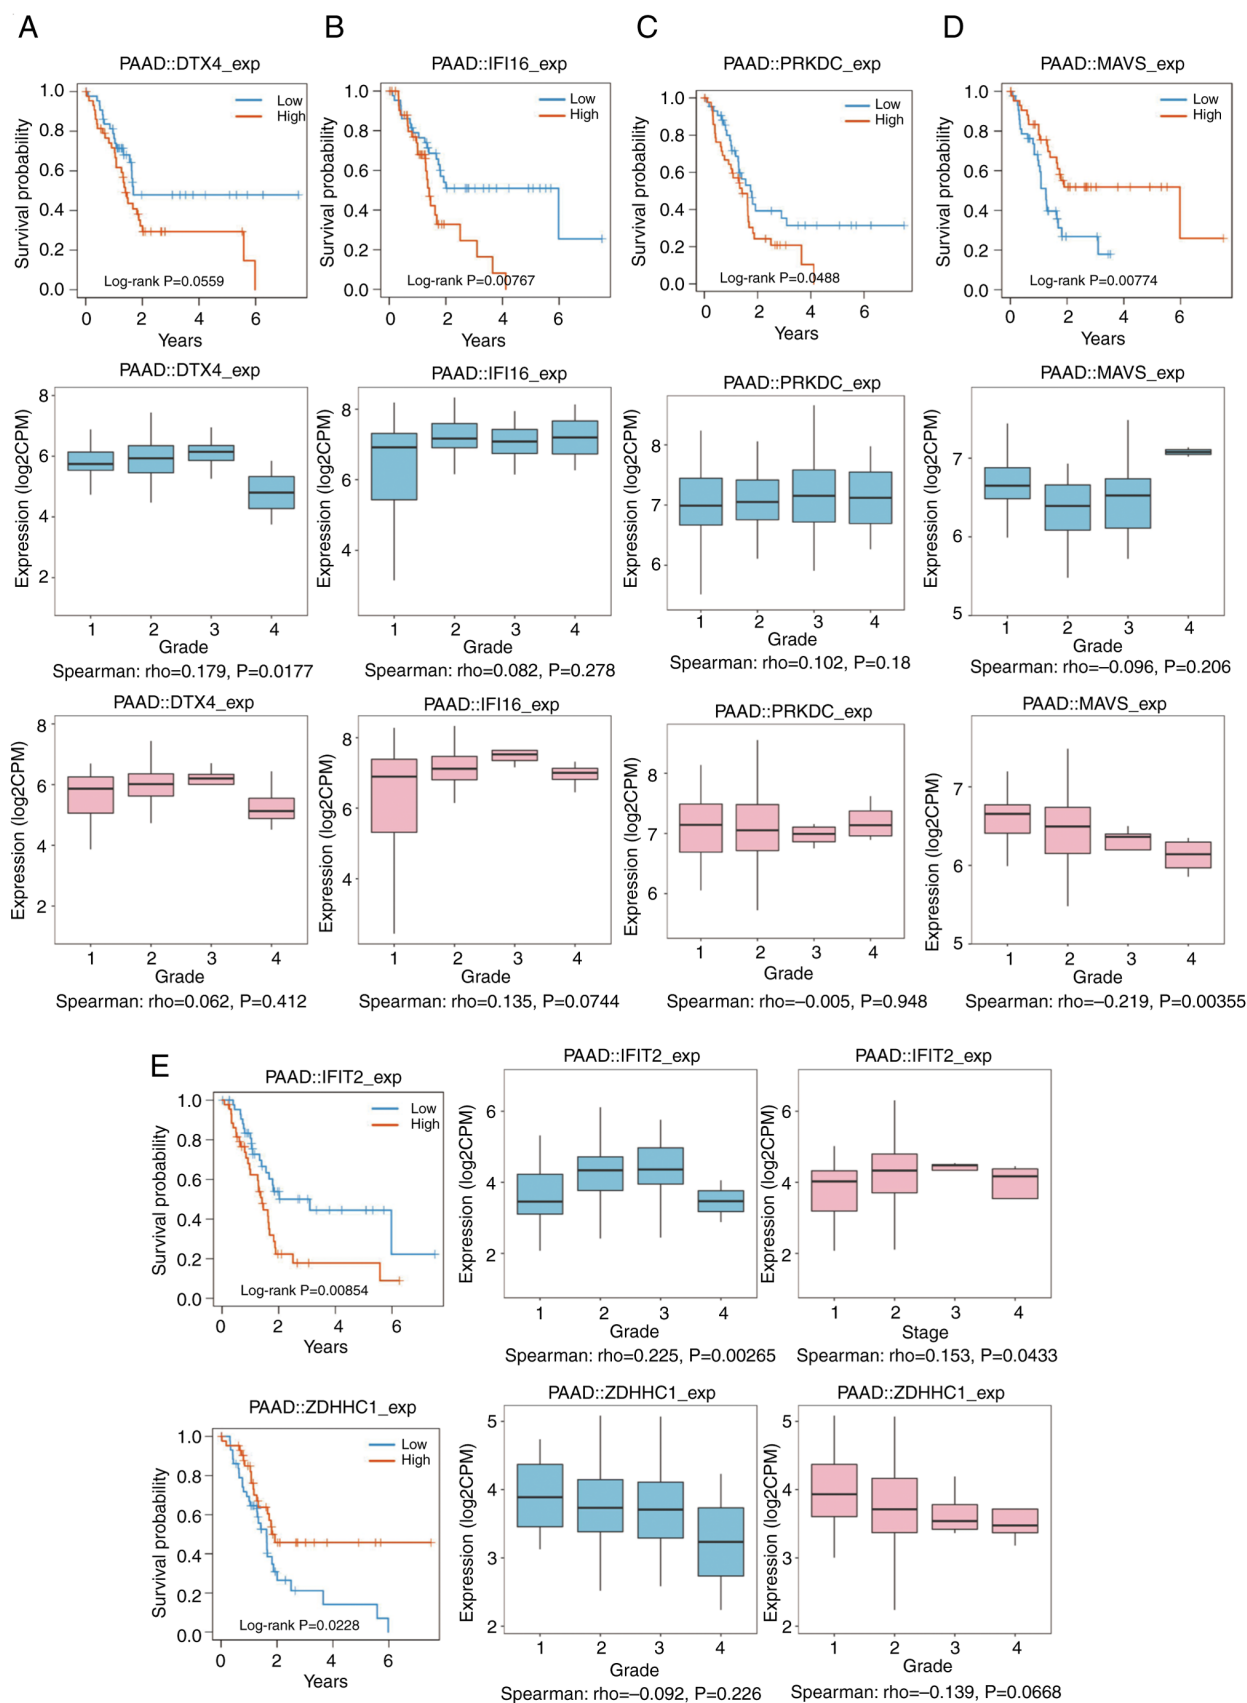

Supplement: Supplementary file 1 [file downloadSupplementary]
